# Supplementary material
Source: PubMed Central journal article supplement (PMC3938960)
Supplement: NIHMS554372-supplement-supplemental_data.pdf [file NIHMS554372-supplement-supplemental_data.pdf]

## Supplemental Figures and Figure legends

Supplemental figure 1

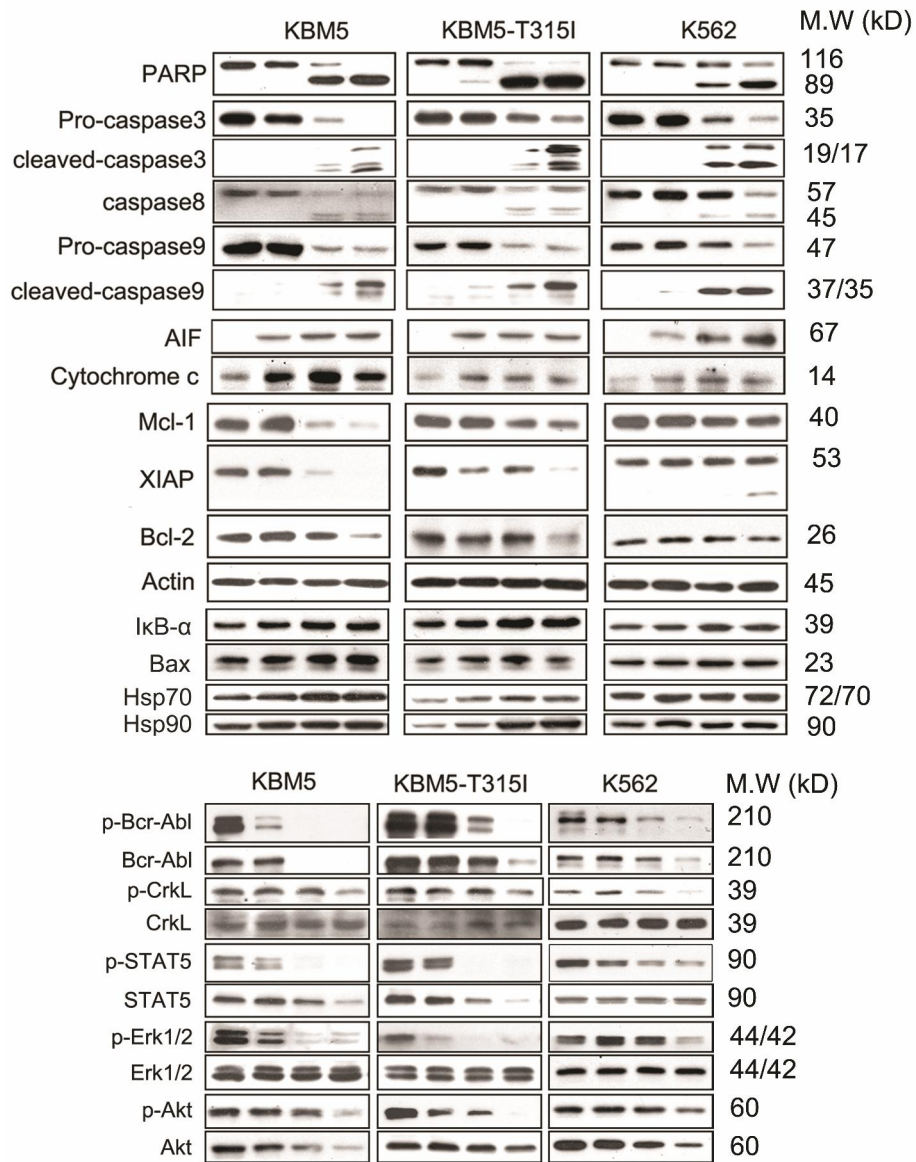

**Supplemental figure 1.** Molecular weight of proteins. All the molecular weight of proteins detected in this current study were labeled. M.W: molecular weight.

Supplementary figure 2

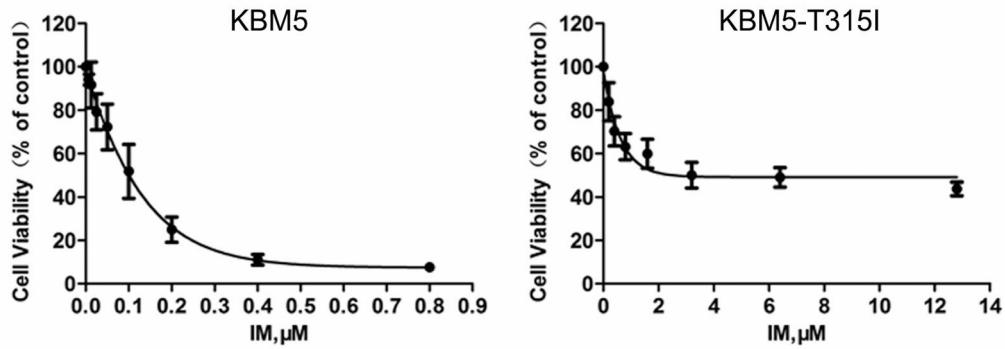

**Supplementary Fig. 2.** KBM5 and KBM5R cells were exposed to IM in various concentrations for 48 hours, and then were subjected to MTS assay.

Supplementary figure 3

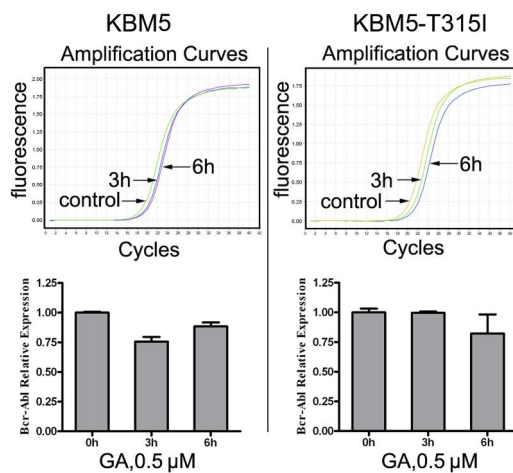

**Supplementary Fig. 3.** GA does not affect mRNA expression of Bcr-Abl. KBM5 and KBM5R cells were exposed to 0.5  $\mu\text{M}$  GA for 3 or 6 hours. The Bcr-Abl mRNA expression was measured by RT-qPCR and its expression level relative to the control was calculated. Mean $\pm$ SD (n=3).

Supplementary figure 4

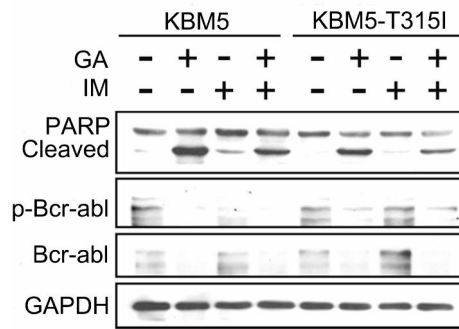

**Supplementary Fig. 4.** KBM5 and KBM5R cells were treated with GA (0.5  $\mu$ M) with/without IM (200 nM) for 12 hours. PARP, total and phosphorylated Bcr-Abl were detected by Western blot.

Supplementary figure 5

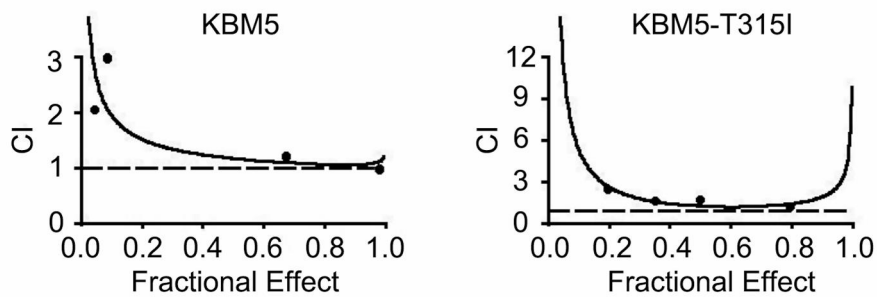

**Supplementary Fig. 5.** Synergistic effect of the combination of GA and IM in KBM5 and KBM5R cells was assessed by MTS assay for 48 h. CI is plotted against the fraction affected. A reference line is drawn at CI=1.0. Combination index values < 1.0 correspond to a synergistic interaction.
